# Supplementary material
Source: PubMed Central journal article supplement (PMC4294242)
Supplement: IAI.02702-14_zii002151045so2.pdf [file IAI.02702-14_zii002151045so2.pdf]

**Table S2.** Significantly up-regulated and down-regulated genes in nsSCV cells in the presence of 0.031% methylglyoxal (day 55) compared to cells grown in batch culture conditions ( $p < 0.05$ ,  $\text{padj} < 1^*$ ).

| Gene name/Gene ID                                | Group/Pathway                                    | Change#          |
|--------------------------------------------------|--------------------------------------------------|------------------|
| <b>Metabolic pathway</b>                         |                                                  |                  |
| <i>argB-argD</i>                                 | Arg and Pro metabolism                           | 3.80             |
| <i>argH-argD</i>                                 | Arg biosynthesis                                 | 6.10             |
| <i>arcD-arcB-arcA</i>                            | Arg metabolism                                   | 3.6-4.3          |
| <i>cysK</i> , SAOUHSC_00422                      | Cys biosynthesis                                 | 5.50             |
| <i>hisH-hisZ</i>                                 | His biosynthesis                                 | 3.70             |
| <i>ilvD-ilvB-ilvH-ilvC-ilvA</i>                  | Iso and Val biosynthesis                         | 4.2-5            |
| <i>leuA-leuB-leuC-leuD</i>                       | Leu biosynthesis                                 | 4.7-4.9          |
| <i>glbB</i>                                      | Glu biosynthesis                                 | 3.70             |
| <i>putA</i>                                      | Pro metabolism                                   | 5.80             |
| <i>thrA-thrB-thrC</i>                            | Thr biosynthesis                                 | 3.60             |
| <b><i>ald</i></b>                                | <b>Ala metabolism</b>                            | <b>0.26</b>      |
| <b><i>trpE-trpG-trpD-trpC-trpF-trpB-trpA</i></b> | <b>Trp biosynthesis</b>                          | <b>0.14-0.18</b> |
| <b><i>dapF</i></b>                               | <b>Lys biosynthesis</b>                          | <b>0.23</b>      |
| <b><i>ilvA</i></b>                               | <b>Thr metabolism</b>                            | <b>0.26</b>      |
| <i>aldA, pckA, acsA</i>                          | Glycolysis/Gluco-genesis                         | 4.2-5.6          |
| <b><i>adhE</i></b>                               | <b>Glycolysis/Gluco-genesis</b>                  | <b>0.11</b>      |
| <b><i>plc, lip</i></b>                           | <b>Lipid metabolism</b>                          | <b>0.2-0.26</b>  |
| <i>fadA-caiA-caiC-fadX</i>                       | Lipid metabolism                                 | 5.2-6.1          |
| <i>azoR</i> , SAOUHSC_00320                      | Riboflavin metabolism                            | 6.90             |
| <b><i>ribD</i></b>                               | <b>Riboflavin biosynthesis</b>                   | <b>0.28</b>      |
| <i>malA</i>                                      | Starch and sucrose metabolism                    | 3.90             |
| <i>ureA-ureB-ureC</i>                            | Urea cycle                                       | 3.6-4            |
| <b><i>pdxD-pdxT</i></b>                          | <b>Pyridoxal biosynthesis</b>                    | <b>0.27</b>      |
| <b><i>ndh</i></b>                                | <b>Energy production and conversion</b>          | <b>0.14</b>      |
| <b>DNA replication</b>                           |                                                  |                  |
| <i>dinP</i>                                      | Similar to Nucleotidyltransferase/DNA polymerase | 3.60             |
| <b>Ribosome</b>                                  |                                                  |                  |
| <b><i>rspN</i></b>                               | <b>Ribosome</b>                                  | <b>0.21</b>      |
| <b>Organic substrate transport</b>               |                                                  |                  |
| <i>ggt</i>                                       | Gamma-glutamyl transport                         | 5.46             |
| SAOUHSC_00424                                    | D-methionine transport                           | 4.30             |
| SAOUHSC_00426                                    | ABC transporter substrate-binding protein        | 4.99             |
| <i>alsT</i>                                      | Na <sup>+</sup> /alanine symporter               | 3.67             |
| SAOUHSC_01990, SAOUHSC_1991                      | Amino acid ABC transporter                       | 5.7-5.9          |
| <i>ansP</i>                                      | Gamma-aminobutyrate transport                    | 5.51             |
| SAOUHSC_02729, SAOUHSC_02923                     | Amino acid transporter                           | 3.7-3.9          |
| SAOUHSC_02924                                    | 4-aminobutyrate                                  | 5.01             |

|                                                 |                                                                  |                       |
|-------------------------------------------------|------------------------------------------------------------------|-----------------------|
| <i>malE</i> , SAOUHSC_00177-<br>SAOUHSC_00178   | aminotransferase<br>Maltose transport                            | 6.5-7.6               |
| SAOUHSC_00167-SAOUHSC_02833<br><i>dppB-dppC</i> | Peptide ABC-type transport<br>ABC-type oligopeptide<br>transport | 3.60<br>5.7-6         |
| <i>msmX</i>                                     | Multiple sugar transport                                         | 5.89                  |
| <i>iolE</i>                                     | Sugar phosphate transport                                        | 6.81                  |
| SAOUHSC_03017                                   | Similar to acetyltransferase<br>(GNAT) domain                    | 3.65                  |
| <b><i>potE</i>, <i>betT</i></b>                 | <b>Amino acid transport</b>                                      | <b>0.17-<br/>0.27</b> |
| <b>SAOUHSC_02763,SAOUHSC_02767</b>              | <b>ABC-type Peptide transport</b>                                | <b>0.27</b>           |
| <b>Inorganic ion transport</b>                  |                                                                  |                       |
| <i>cbiQ-cbiO</i>                                | ABC-type Cobalt transporter                                      | 3.7-4                 |
| <i>tauB-tauA-tauC</i>                           | ABC-type<br>Nitrate/sulfonate/bicarbonate<br>transport           | 5.7-6.5               |
| <i>ceuD</i>                                     | ABC-type Enterochelin (iron<br>chelate) transport                | 3.70                  |
| <i>feoA</i>                                     | Iron (Fe <sup>2+</sup> ) transport                               | 4.70                  |
| SAOUHSC_00423                                   | ABC-type metal ion transport                                     | 4.30                  |
| <b>SAOUHSC_02754</b>                            | <b>ABC transporter ATP-<br/>binding protein</b>                  | <b>0.26</b>           |
| <b>SAOUHSC_02765</b>                            | <b>Nickel ABC transporter<br/>permease</b>                       | <b>0.28</b>           |
| <i>sirC</i>                                     | <b>Iron complex (Iron-<br/>Siderophore) transport</b>            | <b>0.18</b>           |
| <b>Stress response gene</b>                     |                                                                  |                       |
| <i>sodA</i>                                     | <b>Superoxide dismutase</b>                                      | <b>0.26</b>           |
| <i>asp23</i>                                    | <b>Alkaline shock protein 23</b>                                 | <b>0.20</b>           |
| <i>trxB</i>                                     | <b>Thioredoxin reductase</b>                                     | <b>0.20</b>           |
| <b>Membrane protein</b>                         |                                                                  |                       |
| <i>ebh</i>                                      | Extracellular matrix binding<br>protein                          | 5.30                  |
| <i>epiD-epiB-epiA</i>                           | Lantibiotic epidermin<br>biosynthesis protein                    | 3.6-6                 |
| <i>rlp</i>                                      | RGD-containing lipoprotein                                       | 6.10                  |
| <b>SAOUHSC_01135</b>                            | <b>Staph_haemo; Staphylococcus<br/>haemolytic protein</b>        | <b>0.24</b>           |
| <b>SAOUHSC_01136</b>                            | <b>Staph_haemo; Staphylococcus<br/>haemolytic protein</b>        | <b>0.23</b>           |
| <b>SAOUHSC_02019</b>                            | <b>Autolysin</b>                                                 | <b>0.26</b>           |
| <b>SAOUHSC_02243</b>                            | <b>Leukocidin/hemolysin toxin<br/>family protein</b>             | <b>0.28</b>           |

\* pvalue<0.05, padj <1 statistic analysis as determined by the method described in Materials and Methods.

# the ratio of the change in gene expression of nsSCV compared to batch grown cells as log<sub>2</sub>fold change

The bold letters indicate the down regulated genes
