# Supplementary material
Source: PubMed Central journal article supplement (PMC4294242)
Supplement: IAI.02702-14_zii002151045so3.pdf [file IAI.02702-14_zii002151045so3.pdf]

**Table S3.** Complete data list of up-regulated and down-regulated genes (higher than  $\log_2$  2-fold change) in nsSCVs formed under high stress condition (MG 0.031%) compared to cells grown in batch conditions.

| Gene name/Gene ID                                | Group/Pathway                        | Change#          |
|--------------------------------------------------|--------------------------------------|------------------|
| <b>Metabolic pathway</b>                         |                                      |                  |
| <i>argB-argD</i>                                 | Arg and Pro metabolism               | 3.8              |
| <i>arcB-arcC, argJ-argC</i>                      | Arg metabolism                       | 2.2-3.3          |
| <i>arcD-arcB-arcA</i>                            | Arg metabolism                       | 3.6-4.3          |
| <i>argH-argD</i>                                 | Arg biosynthesis                     | 6.1              |
| <i>cysK</i> , SAOUHSC_00422                      | Cys biosynthesis                     | 5.5              |
| <i>hisH-hisZ</i>                                 | His biosynthesis                     | 3.7              |
| <i>hisF-hisA-hisB-hisC-hisD-hisG</i>             | His biosynthesis                     | 2-3.2            |
| <i>leuA-leuB-leuC-leuD</i>                       | Leu biosynthesis                     | 4.7-4.9          |
| <i>gltB</i>                                      | Glu biosynthesis                     | 3.7              |
| <i>putA</i>                                      | Pro metabolism                       | 5.8              |
| <i>rocD</i>                                      | Pro biosynthesis                     | 2.7              |
| <i>thrA-thrB-thrC</i>                            | Thr biosynthesis                     | 3.6              |
| <i>alr</i>                                       | Ala metabolism                       | 2.0              |
| <b><i>ald</i></b>                                | <b>Ala metabolism</b>                | <b>0.3</b>       |
| <b><i>trpE-trpG-trpD-trpC-trpF-trpB-trpA</i></b> | <b>Trp biosynthesis</b>              | <b>0.14-0.18</b> |
| <i>lysC, asd-dapA-dapB-dapD</i>                  | Lys biosynthesis                     | 2.3-3.2          |
| <b><i>dapF</i></b>                               | <b>Lys biosynthesis</b>              | <b>0.2</b>       |
| <b><i>ilvA</i></b>                               | <b>Thr metabolism</b>                | <b>0.3</b>       |
| <b><i>lysA</i></b>                               | <b>Lys biosynthesis</b>              | <b>0.5</b>       |
| <i>gltD</i>                                      | Glu biosynthesis                     | 3.3              |
| <i>rocA, gdhA</i>                                | Glu metabolism                       | 2.4              |
| <b><i>glnR-glnA</i></b>                          | <b>Glu biosynthesis</b>              | <b>0.4</b>       |
| <i>serA</i> , SAOUHSC_01832                      | Ser metabolism                       | 3.1              |
| <i>aldA, pckA, acsA</i>                          | Glycolysis/Gluco-genesis             | 4.2-5.6          |
| <i>gap</i>                                       | Glycolysis/Gluco-genesis             | 3.4              |
| <b><i>adhE</i></b>                               | <b>Glycolysis/Gluco-genesis</b>      | <b>0.1</b>       |
| <b><i>ldh1, adhA, gap-pgk-tpiA-pgm</i></b>       | <b>Glycolysis/Gluco-genesis</b>      | <b>0.4</b>       |
| <b><i>aldH, gpmA, ldh</i></b>                    | <b>Glycolysis/Gluco-genesis</b>      | <b>0.5</b>       |
| <b><i>plc, lip</i></b>                           | <b>Lipid metabolism</b>              | <b>0.2-0.26</b>  |
| <b><i>pnbA</i></b>                               | <b>Lipid metabolism</b>              | <b>0.4</b>       |
| <i>fadA-caiA-caiC-fadX</i>                       | Lipid metabolism                     | 5.2-6.1          |
| <i>fadB, dhaL, lip</i>                           | Lipid metabolism                     | 2.3-2.7          |
| <i>malA</i>                                      | Starch and sucrose metabolism        | 3.9              |
| <i>gutB</i>                                      | Starch and sucrose metabolism        | 2.3              |
| <b><i>xynB</i></b>                               | <b>Starch and sucrose metabolism</b> | <b>0.4</b>       |
| <i>fdhD</i>                                      | Formate metabolism                   | 2.0              |
| <i>lacG-lacD-lacC-lacB-lacA</i>                  | Galactose metabolism                 | 2.1-3            |
| <i>araB</i>                                      | Ribulose metabolism                  | 2.1              |

|                                                   |                                                     |              |
|---------------------------------------------------|-----------------------------------------------------|--------------|
| <i>pfkB</i>                                       | Lactose metabolism                                  | 2.8          |
| <i>ureA-ureB-ureC</i>                             | Urea cycle                                          | 3.6-4        |
| <i>ureE-ureF-ureG-ureD</i>                        | Urea cycle                                          | 2.8-3.2      |
| <b><i>ndh</i></b>                                 | <b>Energy production and conversion</b>             | <b>0.1</b>   |
| <b><i>narJ-narY-narG</i></b>                      | <b>Energy production and conversion</b>             | <b>0.5</b>   |
| <i>pflA, pycA, sdhB, citC-citZ</i>                | TCA cycle                                           | 2-2.2        |
| <i>sucC-sucD-sucB-sucA</i>                        | TCA cycle                                           | 2.1-3.2      |
| <b><i>drm, nrdD</i></b>                           | <b>Pyrimidine/Purine metabolism</b>                 | <b>0.5</b>   |
| SAOUHSC_02057                                     | Pyrimidine/Purine metabolism                        | 2.1          |
| <i>ndhF, ldh,</i><br>SAOUHSC_01728, SAOUHSC_02829 | Oxidoreductase                                      | 2.8          |
| <i>murQ-murP, nanA</i>                            | Cell wall biosynthesis                              | 2.4-2.8      |
| <i>azoR</i> , SAOUHSC_00320                       | Riboflavin metabolism                               | 6.9          |
| <b><i>ribH-ribD-ribB</i></b>                      | <b>Riboflavin biosynthesis</b>                      | <b>0.4</b>   |
| <b><i>ribD</i></b>                                | <b>Riboflavin biosynthesis</b>                      | <b>0.3</b>   |
| <b><i>thiM-thiD-tenA</i></b>                      | <b>Thiamine biosynthesis</b>                        | <b>0.5</b>   |
| <b><i>pdxD-pdxT</i></b>                           | <b>Pyridoxal biosynthesis</b>                       | <b>0.3</b>   |
| <b><i>crtI</i></b>                                | <b>Carotenoid biosynthesis</b>                      | <b>0.4</b>   |
| <b>SAOUHSC_02849</b>                              | <b>Pyruvate metabolism</b>                          | <b>0.4</b>   |
| <b>Organic substrate transport</b>                |                                                     |              |
| <i>ggt</i>                                        | Gamma-glutamyl transport                            | 5.5          |
| SAOUHSC_00424                                     | D-methionine transport                              | 4.3          |
| SAOUHSC_00426                                     | ABC transporter substrate-binding protein           | 5.0          |
| <i>alsT</i>                                       | Na <sup>+</sup> /alanine symporter                  | 3.7          |
| SAOUHSC_01990, SAOUHSC_1991                       | Amino acid ABC transporter                          | 5.7-5.9      |
| <i>ansP</i>                                       | Gamma-aminobutyrate transport                       | 5.5          |
| SAOUHSC_02729, SAOUHSC_02923                      | Amino acid transporter                              | 3.7-3.9      |
| SAOUHSC_02924                                     | 4-aminobutyrate aminotransferase                    | 5.0          |
| <i>malE</i> , SAOUHSC_00177-<br>SAOUHSC_00178     | Maltose transport                                   | 6.5-7.6      |
| SAOUHSC_00167-SAOUHSC_02833                       | Peptide ABC-type transport                          | 3.6          |
| <b><i>dppB-dppC</i></b>                           | <b>ABC-type oligopeptide transport</b>              | <b>5.7-6</b> |
| <i>msmX</i>                                       | Multiple sugar transport                            | 5.9          |
| <i>iolE</i>                                       | Sugar phosphate transport                           | 6.8          |
| SAOUHSC_03017                                     | Similar to acetyltransferase (GNAT) domain          | 3.6          |
| SAOUHSC_00970                                     | ABC transporter ATP-binding protein                 | 3.5          |
| SAOUHSC_01389                                     | Phosphate ABC transporter substrate-binding protein | 2.4          |
| <i>putB</i>                                       | Proline transport                                   | 2.6          |
| <i>abgT</i>                                       | p-aminobenzoyl-glutamate                            | 2.6          |

|                                    |                                                  |                  |
|------------------------------------|--------------------------------------------------|------------------|
|                                    | transporter                                      |                  |
| SAOUHSC_00658                      | Mannose PTS transpoter                           | 2.3              |
| <i>lacE</i>                        | Galactose PTS transport                          | 2.7              |
| <i>glpF, glpT</i>                  | Glycerol transpot                                | 2.3-3.3          |
| SAOUHSC_02848                      | Glucose PTS transpoter                           | 3.3              |
| <i>oppC-oppD-oppF-oppA-dppA</i>    | ABC-type Oligopeptide transport                  | 2.2-2.7          |
| <i>uhpT</i>                        | Sugar phosphate antiport                         | 2.6              |
| <i>treP</i>                        | Trehalose PTS transpot                           | 2.6              |
| <i>utp</i>                         | Urea transporter                                 | 3.0              |
| <b><i>potE, betT</i></b>           | <b>Amino acid transport</b>                      | <b>0.17-0.27</b> |
| <b>SAOUHSC_02763,SAOUHSC_02767</b> | <b>ABC-type Peptide transport</b>                | <b>0.3</b>       |
| <b><i>potE</i></b>                 | <b>Amino acid transporter</b>                    | <b>0.3</b>       |
| <b><i>lldP</i></b>                 | <b>Lactate transporter</b>                       | <b>0.3</b>       |
| <b>SAOUHSC_02764, _02766</b>       | <b>Peptide ABC-type transport</b>                | <b>0.3</b>       |
| <b><i>mltA/mltF</i></b>            | <b>Mannitol PTS transporter</b>                  | <b>0.3</b>       |
| <b>Inorganic ion transport</b>     |                                                  |                  |
| <i>cbiQ-cbiO</i>                   | ABC-type Cobalt transporter                      | 3.7-4            |
| <i>tauB-tauA-tauC</i>              | ABC-type Nitrate/sulfonate/bicarbonate transport | 5.7-6.5          |
| <i>ceuD</i>                        | ABC-type Enterochelin (iron chelat) transport    | 3.7              |
| <i>feoA</i>                        | Iron (Fe <sup>2+</sup> ) transport               | 4.7              |
| SAOUHSC_00423                      | ABC-type metal ion transport                     | 4.3              |
| <b>SAOUHSC_02754</b>               | <b>ABC transporter ATP-binding protein</b>       | <b>0.3</b>       |
| <b>SAOUHSC_02765</b>               | <b>Nickel ABC transporter permease</b>           | <b>0.3</b>       |
| <b><i>sirC</i></b>                 | <b>Iron complex (Iron-Siderophore) transport</b> | <b>0.2</b>       |
| <i>cbiO</i>                        | ABC-type Cobalt transport                        | 3.3              |
| <i>fepG</i>                        | ABC-type Enterobactin transport                  | 2.0              |
| <i>fecB</i>                        | ABC-type Fe <sup>3+</sup> -citrate transport     | 3.1              |
| <i>fepB</i>                        | ABC-type Fe <sup>3+</sup> -hydroxamate transport | 2.5              |
| <i>ceuA</i>                        | ABC-type Enterochelin transport                  | 2.7              |
| <i>natB</i>                        | Na <sup>+</sup> efflux pump                      | 2.1              |
| SAOUHSC_02137                      | Sodium-dependent transporter                     | 2.5              |
| <b><i>cbiQ-cbiO</i></b>            | <b>ABC-type Cobalt transporter</b>               | <b>0.4</b>       |
| <b><i>focA</i></b>                 | <b>Formate/nitrite transporter</b>               | <b>0.5</b>       |
| <b><i>nhaC</i></b>                 | <b>Na<sup>+</sup>/H<sup>+</sup> antiporter</b>   | <b>0.4</b>       |
| <b><i>narK</i></b>                 | <b>Nitrate/nitrite transporter</b>               | <b>0.4</b>       |

|                                            |                                                                              |                 |
|--------------------------------------------|------------------------------------------------------------------------------|-----------------|
| <b>Ribosome</b>                            |                                                                              |                 |
| <i>rspN</i>                                | <b>Ribosome</b>                                                              | <b>0.2</b>      |
| <b>DNA replication</b>                     |                                                                              |                 |
| <i>dinP</i>                                | Similar to Nucleotidyltransferase/DNA polymerase                             | 3.6             |
| SAOUHSC_00049                              | <b>Similar to superfamily I DNA and RNA helicases and helicase subunits</b>  | <b>0.5</b>      |
| SAOUHSC_00624                              | <b>Integrase/recombinase</b>                                                 | <b>0.5</b>      |
| <b>Transcription/Regulatory protein</b>    |                                                                              |                 |
| SAOUHSC_00296                              | ROK family protein (repressors, open reading frames, and kinases)            | <b>2.1</b>      |
| <i>malR</i>                                | Maltose operon transcriptional repressor                                     | 3.2             |
| <i>rpiR</i>                                | Transcriptional regulators                                                   | 2.9             |
| <i>marR</i>                                | MarR family transcriptional regulator                                        | 3.5             |
| <i>agr</i>                                 | <b>Accessory regulator-like protein</b>                                      | <b>0.4</b>      |
| <i>gntR</i>                                | <b>GntR family transcriptional regulator</b>                                 | <b>0.4</b>      |
| <i>lrgB</i>                                | <b>Antiholin-like protein LrgB</b>                                           | <b>0.4</b>      |
| <i>gapR</i>                                | <b>Glycolytic operon regulator</b>                                           | <b>0.3</b>      |
| <i>rsbW</i>                                | <b>Serine-protein kinase RsbW (anti sigma factor)</b>                        | <b>0.5</b>      |
| <i>rsbV</i>                                | <b>STAS domain-containing protein (Sulphate Transporter and Anti-Sigma )</b> | <b>0.5</b>      |
| <i>blgG</i>                                | <b>Similar to Transcriptional antiterminator BlgG</b>                        | <b>0.4</b>      |
| <b>Translation</b>                         |                                                                              |                 |
| SAOUHSC_00031                              | <b>Similar to tRNA-dihydrouridine synthase</b>                               | <b>0.3</b>      |
| SAOUHSC_00039                              | <b>Similar to tRNA-dihydrouridine synthase</b>                               | <b>0.4</b>      |
| <b>Stress response gene</b>                |                                                                              |                 |
| <i>sodA</i>                                | <b>Superoxide dismutase</b>                                                  | <b>0.3</b>      |
| <i>asp23</i>                               | <b>Alkaline shock protein 23</b>                                             | <b>0.2</b>      |
| <i>trxB</i>                                | <b>Thioredoxin reductase</b>                                                 | <b>0.2</b>      |
| <b>Bacteriophage</b>                       |                                                                              |                 |
| SAOUHSC_01539                              | Terminase small subunit                                                      | 3.6             |
| <b>Capsule biosynthesis</b>                |                                                                              |                 |
| <i>cap5B-cap8C-cap5D-cap5E-cap8F-cap5H</i> | <b>Capsule biosynthesis</b>                                                  | <b>0.3-0.42</b> |
| <b>Membrane protein/Chaperon</b>           |                                                                              |                 |
| <i>ebh</i>                                 | Extracellular matrix binding protein                                         | 5.3             |

|                       |                                                                                      |            |
|-----------------------|--------------------------------------------------------------------------------------|------------|
| <i>epiD-epiB-epiA</i> | Lantibiotic epidermin biosynthesis protein                                           | 3.6-6      |
| <i>rlp</i>            | RGD-containing lipoprotein                                                           | 6.1        |
| SAOUHSC_00069         | Protein A                                                                            | 2.5        |
| <i>lytN</i>           | Cell wall hydrolase                                                                  | 3.5        |
| <i>chp</i>            | Chemotaxis-inhibiting protein CHIPS                                                  | 2.9        |
| <i>epiC</i>           | Epidermin biosynthesis protein EpiC                                                  | 3.4        |
| <i>drp35</i>          | Lactonase Drp35                                                                      | 2.0        |
| <i>clpB</i>           | ATP-dependent Clp protease ATP-binding subunit ClpB                                  | 2.3        |
| SAOUHSC_01949         | Intracellular serine protease                                                        | 3.0        |
| <b>SAOUHSC_01135</b>  | <b>Staph_haemo;</b><br><b>Staphylococcus haemolytic protein</b>                      | <b>0.2</b> |
| <b>SAOUHSC_01136</b>  | <b>Staph_haemo;</b><br><b>Staphylococcus haemolytic protein</b>                      | <b>0.2</b> |
| SAOUHSC_02019         | Autolysin                                                                            | 0.3        |
| SAOUHSC_02243         | Leukocidin/hemolysin toxin family protein                                            | 0.3        |
| <i>emp</i>            | Extracellular matrix and plasma binding protein                                      | 0.4        |
| SAOUHSC_02821         | Membrane spanning protein                                                            | 0.4        |
| SAOUHSC_02167         | Similar to <b>CompInhib_SCIN;</b><br><b>Staphylococcal complement inhibitor SCIN</b> | <b>0.4</b> |
| <i>sak</i>            | Staphylokinase                                                                       | 0.3        |
| SAOUHSC_02241         | Similar to Leukocidin                                                                | 0.3        |
| <i>hld</i>            | Delta-hemolysin                                                                      | 0.4        |
| <i>sbi</i>            | Immunoglobulin G-binding protein Sbi                                                 | 0.4        |
| <i>clpC</i>           | Chaperon ATP-dependent Clp protease ATP-binding subunit ClpC                         | 0.4        |

# the ratio of the change in gene expression of nsSCV compared to batch grown cells as log<sub>2</sub>fold change

The bold letters indicate the down regulated genes
