# Supplementary material
Source: PubMed Central journal article supplement (PMC4294242)
Supplement: IAI.02702-14_zii002151045so4.pdf [file IAI.02702-14_zii002151045so4.pdf]

**Table S4.** Significantly up-regulated and down-regulated genes in nsSCV cells in the presence of a methylglyoxal concentration of 0.031% (day 55) compared to cells grown at a methylglyoxal concentration of 0.0078% ( $p < 0.05$ ,  $p_{adj} < 1^*$ ).

| Gene name/Gene ID                                                                                | Group/Pathway                                         | Change#          |
|--------------------------------------------------------------------------------------------------|-------------------------------------------------------|------------------|
| <b>Metabolic pathway</b>                                                                         |                                                       |                  |
| <i>cysK</i> , SAOUHSC_00422                                                                      | Cys biosynthesis                                      | 3.5              |
| <i>gltB-gltD</i> , <i>rocA</i>                                                                   | Glu biosynthesis                                      | 3.2              |
| <i>rocD</i>                                                                                      | Pro biosynthesis                                      | 3.6              |
| <i>argH-argG</i>                                                                                 | Arg biosynthesis                                      | 3.9-4.3          |
| <i>thrA-thrB-thrC</i>                                                                            | Thr biosynthesis                                      | 3.5-3.9          |
| <i>lysC-asd-dapA-dapB-dapD</i>                                                                   | Lys biosynthesis                                      | 3.1-3.6          |
| <b><i>trpE</i>, <i>trpG</i>, <i>trpD</i>, <i>trpC</i>, <i>trpF</i>, <i>trpB</i>, <i>trpA</i></b> | <b>Tryptophan biosynthesis</b>                        | <b>0.29-0.31</b> |
| <b><i>ilvA</i></b>                                                                               | <b>Thr metabolism</b>                                 | <b>0.30</b>      |
| <i>leuA-leuB-leuC-leuD</i>                                                                       | Leu biosynthesis                                      | 3.4-3.7          |
| <i>gdhA</i>                                                                                      | Glu metabolism                                        | 3.2              |
| <i>hutU</i>                                                                                      | His metabolism                                        | 3.6              |
| SAOUHSC_00195- <i>fadB-caiA-caiC-fadX</i>                                                        | Lipid metabolism                                      | 4.4-7.9          |
| <i>malA</i> , <i>gutB</i>                                                                        | Starch and sucrose metabolism                         | 4.4              |
| <i>aldA</i> , <i>gap</i> , <i>acsA</i>                                                           | Glycolysis/Gluconeogenesis                            | 4-6.3            |
| <b><i>adhE</i>, <i>adhA</i></b>                                                                  | <b>Glycolysis / Gluconeogenesis</b>                   | <b>0.28-0.31</b> |
| <i>citZ</i> , <i>pckA</i>                                                                        | TCA cycle                                             | 3.1-4.2          |
| <i>mviM</i> , SAOUHSC_02829                                                                      | Oxidoreducraase                                       | 8.3              |
| <i>ureA-ureB-ureC-ureE-ureF</i>                                                                  | Urea cycle                                            | 3.3-4.6          |
| <i>nanA</i>                                                                                      | Cell wall biosynthesis                                | 3.3              |
| <b>Transcription/Regulatory protein</b>                                                          |                                                       |                  |
| <i>blgG</i>                                                                                      | Similar to Transcriptional antiterminator             | 3.3              |
| <i>malR</i>                                                                                      | Maltose operon transcriptional repressor              | 3.6              |
| <i>lytT</i>                                                                                      | Similar to Response regulator of the LytR/AlgR family | 3.7              |
| <i>marR</i>                                                                                      | Similar to MarR; Transcriptional regulators           | 4.1              |
| <b>Organic substrate transport</b>                                                               |                                                       |                  |
| <b><i>potE</i></b>                                                                               | <b>Amino acid transport</b>                           | <b>0.30</b>      |
| <i>dppB-dppC</i>                                                                                 | ABC-type Oligopeptide transport                       | 4.5-4.7          |
| <i>ggt</i>                                                                                       | Gamma-glutamyl transport                              | 4-4.8            |
| <i>malE</i> -SAOUHSC_00177- <i>ugpE</i>                                                          | Maltose transport                                     | 7.5-8.1          |
| <i>msmX</i>                                                                                      | Multiple Sugar transport                              | 6.8              |
| <i>iolE</i>                                                                                      | Sugar phosphate transport                             | 7.1              |
| <i>gatC</i>                                                                                      | Galactitol PTS transport                              | 3.3              |
| <i>fruA</i>                                                                                      | Fructose PTS transport                                | 3.7              |
| <i>ulaA</i> -SAOUHSC_00311-<br>SAOUHSC_00312                                                     | Ascorbate PTS transport                               | 3.2              |
| <i>alsT</i>                                                                                      | Na+/alanine symporter                                 | 4.8              |

|                                 |                                                     |         |
|---------------------------------|-----------------------------------------------------|---------|
| SAOUHSC_01389                   | Phosphate ABC transporter substrate-binding protein | 3.5     |
| SAOUHSC_01990-<br>SAOUHSC_01991 | Amino acid ABC-type transport                       | 3.7-4   |
| <i>ansP</i>                     | Gamma-aminobutyrate transport                       | 4.0     |
| <i>gltS</i>                     | sodium/glutamate symporter                          | 4.6     |
| SAOUHSC_02729,SAOUHSC_02923     | Amino acid ABC transport                            | 3.6-4.1 |
| SAOUHSC_02815                   | D-galactonate transport                             | 3.8     |
| SAOUHSC_02924                   | 4-aminobutyrate amino transport                     | 4.0     |

### Inorganic ion transport and metabolism

|                  |                                                    |         |
|------------------|----------------------------------------------------|---------|
| <i>tauB-tauA</i> | ABC-type nitrate/sulfonate/bicarbonate transporter | 3.1-3.5 |
| <i>citT</i>      | Di- and tricarboxylate transporters                | 3.5     |

### Stress response protein

|              |                         |      |
|--------------|-------------------------|------|
| <i>asp23</i> | Stress response protein | 0.31 |
|--------------|-------------------------|------|

### Membrane Protein

|                      |                                                                  |             |
|----------------------|------------------------------------------------------------------|-------------|
| SAOUHSC_00069        | Protein A                                                        | 3.6         |
| <i>ebh</i>           | Extracellular matrix binding protein                             | 3.6         |
| <i>rlp</i>           | RGD-containing lipoprotein (lipoprotein containing Arg-Gly-Asp)  | 4.8         |
| <b>SAOUHSC_01135</b> | <b>Similar to Staph_haemo; Staphylococcus haemolytic protein</b> | <b>0.29</b> |
| <b>SAOUHSC_01136</b> | <b>Staph_haemo; Staphylococcus haemolytic protein</b>            | <b>0.29</b> |
| <i>hld</i>           | <b>delta-hemolysin</b>                                           | <b>0.32</b> |

\* pvalue<0.05, padj <1 statistic analysis as determined by the method described in Materials and Methods.

# the ratio of the change in gene expression of nsSCV (0.03% methylglyoxal) compared to cells grown at a methylglyoxal concentration of 0.008% and determined as log<sub>2</sub>fold change.

The bold letters indicate the down regulated genes
