# Supplementary material
Source: PubMed Central journal article supplement (PMC4294242)
Supplement: IAI.02702-14_zii002151045so5.pdf [file IAI.02702-14_zii002151045so5.pdf]

**Table S5.** Complete data list of up-regulated and down-regulated genes (higher than log<sub>2</sub> 2-fold change) in nsSCVs cells (MG 0.031%) compared to cells grown at methylglyoxal concentration of 0.0078%.

| Gene name/Gene ID                                                                                | Group/Pathway                       | Change           |
|--------------------------------------------------------------------------------------------------|-------------------------------------|------------------|
| <b>Metabolic pathway</b>                                                                         |                                     |                  |
| <i>cysK</i> , SAOUHSC_00422                                                                      | Cys biosynthesis                    | 3.5              |
| <i>gltB-gltD</i> , <i>rocA</i>                                                                   | Glu biosynthesis                    | 3.2              |
| <i>gdhA</i>                                                                                      | Glu metabolism                      | 3.2              |
| <b><i>glnR</i>, <i>glnA</i></b>                                                                  | <b>Glu biosynthesis</b>             | <b>0.4-0.45</b>  |
| <i>rocD</i>                                                                                      | Pro biosynthesis                    | 3.6              |
| <i>putA</i>                                                                                      | Pro metabolism                      | 2.5              |
| <i>argH-argG</i>                                                                                 | Arg biosynthesis                    | 3.9-4.3          |
| <i>arg</i> , <i>acrB-arcA</i>                                                                    | Arg metabolism                      | 2.6-2.7          |
| <i>lysC-asd-dapA-dapB-dapD</i>                                                                   | Lys biosynthesis                    | 3.1-3.6          |
| <b>SAOUHSC_02244</b>                                                                             | <b>Lys biosynthesis</b>             | <b>0.5</b>       |
| <i>alr</i>                                                                                       | Ala biosynthesis                    | 2.5              |
| <i>ald</i>                                                                                       | Ala metabolism                      | 2.5              |
| <b><i>ald</i></b>                                                                                | <b>Ala metabolism</b>               | <b>0.3</b>       |
| <i>gltD</i>                                                                                      | Gly biosynthesis                    | 2.7              |
| <i>hisC</i> , <i>hutI</i>                                                                        | His metabolism                      | 2.9-3            |
| <i>hutU</i>                                                                                      | His metabolism                      | 3.6              |
| <i>ilvB-ilvA</i>                                                                                 | Iso, Val biosynthesis               | 2.9              |
| SAOUHSC_01832, <i>serA</i>                                                                       | Ser biosynthesis                    | 2.3-2.5          |
| <b><i>trpE</i>, <i>trpG</i>, <i>trpD</i>, <i>trpC</i>, <i>trpF</i>, <i>trpB</i>, <i>trpA</i></b> | <b>Tryptophan biosynthesis</b>      | <b>0.29-0.31</b> |
| <i>thrA-thrB-thrC</i>                                                                            | Thr biosynthesis                    | 3.5-3.9          |
| <i>tdh</i>                                                                                       | Thr metabolism                      | 2.6              |
| <b><i>ilvA</i></b>                                                                               | <b>Thr metabolism</b>               | <b>0.3</b>       |
| <i>leuA-leuB-leuC-leuD</i>                                                                       | Leu biosynthesis                    | 3.4-3.7          |
| SAOUHSC_00195- <i>fadB-caiA-caiC-fadX</i>                                                        | Lipid metabolism                    | 4.4-7.9          |
| <i>caiA</i> , SAOUHSC_00656, <i>lip</i>                                                          | Lipid metabolism                    | 2.2-3            |
| <b><i>lip</i>, <i>pnbA</i></b>                                                                   | <b>Lipid metabolism</b>             | <b>0.37-0.43</b> |
| <i>malA</i> , <i>gutB</i>                                                                        | Starch and sucrose metabolism       | 4.4              |
| <i>aldA</i> , <i>gap</i> , <i>acsA</i>                                                           | Glycolysis/Gluconeogenesis          | 4-6.3            |
| <b><i>adhE</i>, <i>adhA</i></b>                                                                  | <b>Glycolysis / Gluconeogenesis</b> | <b>0.28-0.31</b> |
| <b><i>plc</i>, <i>ldh</i>, <i>gapR</i>, <i>gap</i>, <i>pgk</i>, <i>tpiA</i>, <i>pgm</i></b>      | <b>Glycolysis / Gluconeogenesis</b> | <b>0.33-0.37</b> |
| <i>citZ</i> , <i>pckA</i>                                                                        | TCA cycle                           | 3.1-4.2          |
| <i>sdhC-sdhA-sdhB</i> ,                                                                          | TCA cycle                           | 2-2.9            |
| <i>sucC</i> , <i>sucD</i> , <i>sucB</i> , <i>sucA</i> , <i>citC</i>                              | Urea cycle                          | 3.3-4.6          |
| <i>ureA-ureB-ureC-ureE-ureF</i>                                                                  | Urea cycle                          | 3.0              |
| <i>ureG-ureD</i>                                                                                 | Urea cycle                          | 3.0              |
| <i>nanA</i>                                                                                      | Cell wall biosynthesis              | 3.3              |
| <i>ddh</i> , <i>ndhF</i> , SAOUHSC_01728                                                         | Oxidoreductase                      | 2.1-2.8          |
| <i>arabB</i>                                                                                     | Ruboluse metabolism                 | 2.5              |
| <i>acpD</i>                                                                                      | Riboflavin metabolism               | 2.6              |
| <b><i>pdxS</i>, <i>pdxT</i></b>                                                                  | <b>Pyridoxal biosynthesis</b>       | <b>0.35-0.45</b> |
| <b><i>nrdD</i></b>                                                                               | <b>Pyrimidin metabolism</b>         | <b>0.5</b>       |

**Organic substrate transport**

|                                               |                                                     |            |
|-----------------------------------------------|-----------------------------------------------------|------------|
| <i>dppB-dppC</i>                              | ABC-type Oligopeptide transport                     | 4.5-4.7    |
| <i>ggt</i>                                    | Gamma-glutamyl transport                            | 4-4.8      |
| <i>malE</i> -SAOUHSC_00177- <i>ugpE</i>       | Maltose transport                                   | 7.5-8.1    |
| <i>msmX</i>                                   | Multiple Sugar transport                            | 6.8        |
| <i>iolE</i>                                   | Sugar phosphate transport                           | 7.1        |
| <i>gatC</i>                                   | Galactitol PTS transport                            | 3.3        |
| <i>fruA</i>                                   | Fructose PTS transport                              | 3.7        |
| <i>ulaA</i> -SAOUHSC_00311-<br>SAOUHSC_00312  | Ascorbate PTS transport                             | 3.2        |
| <i>alsT</i>                                   | Na <sup>+</sup> /alanine symporter                  | 4.8        |
| SAOUHSC_01389                                 | Phosphate ABC transporter substrate-binding protein | 3.5        |
| SAOUHSC_01990-<br>SAOUHSC_01991               | Amino acid ABC-type transport                       | 3.7-4      |
| <i>ansP</i>                                   | Gamma-aminobutyrate transport                       | 4.0        |
| <i>gltS</i>                                   | sodium/glutamate symporter                          | 4.6        |
| SAOUHSC_02729,SAOUHSC_02923                   | Amino acid ABC transport                            | 3.6-4.1    |
| SAOUHSC_02815                                 | D-galactonate transport                             | 3.8        |
| SAOUHSC_02924                                 | 4-aminobutyrate amino transport                     | 4.0        |
| <i>murP</i>                                   | N-acetylmuramic acid transport                      | 2.0        |
| <i>oppC-oppD-oppF-oppA</i> ,<br>SAOUHSC_00167 | ABC-type Oligopeptide transporter                   | 2-2.6      |
| <i>uhpT</i>                                   | Sugar phosphate antiporter                          | 2.3        |
| SAOUHSC_00214,<br>SAOUHSC_00215               | Galactitol transporter                              | 2.5-2.9    |
| <i>glpT,glpF</i>                              | Glycerol transport                                  | 2.5-2.9    |
| SAOUHSC_00423,<br>SAOUHSC_00424               | Methionine transporter                              | 2.7-2.8    |
| SAOUHSC_00658                                 | Mannose transport                                   | 2.3        |
| SAOUHSC_00970                                 | Binding protein                                     | 2.7        |
| <i>putB</i>                                   | Pro transporter                                     | 2.3        |
| <i>utp</i>                                    | Urea transporter                                    | 2.1        |
| <i>ptsG</i>                                   | Sugar transporter                                   | 2.5        |
| <i>abgT</i>                                   | p-aminobenzoyl-glutamate transporter                | 2.0        |
| <i>potE</i>                                   | <b>Amino acid transport</b>                         | <b>0.3</b> |
| SAOUHSC_02754                                 | <b>ABC transporter ATP-binding protein</b>          | <b>0.5</b> |

**Inorganic ion transport**

|                  |                                                    |         |
|------------------|----------------------------------------------------|---------|
| <i>tauB-tauA</i> | ABC-type nitrate/sulfonate/bicarbonate transporter | 3.1-3.5 |
| <i>citT</i>      | Di- and tricarboxylate transporters                | 3.5     |
| <i>tauC</i>      | nitrate/sulfonate/bicarbonate                      | 2.6     |

|                                         |                                                                                            |            |
|-----------------------------------------|--------------------------------------------------------------------------------------------|------------|
|                                         | transport                                                                                  |            |
| <i>fecB</i>                             | Fe3+-citrate transporter                                                                   | 2.5        |
| <i>pstG</i>                             | Glucose transport                                                                          | 2.6        |
| <i>feoA</i>                             | Fe2+ transport                                                                             | 3.9        |
| <i>cbiQ, cbiO</i>                       | Cobalt transport                                                                           | 2.4-2.6    |
| <i>ptsC, pstA</i>                       | Phosphate transporter                                                                      | 2.2-2.7    |
| <i>sirC</i>                             | <b>Iron-Siderophore transport</b>                                                          | <b>0.4</b> |
| <i>focA</i>                             | <b>Formate/nitrite transport</b>                                                           | <b>0.4</b> |
| <i>cbiQ</i>                             | <b>Cobalt transport</b>                                                                    | <b>0.5</b> |
| SAOUHSC_01022                           | <b>Cobalt transport</b>                                                                    | <b>0.5</b> |
| <i>lldP</i>                             | <b>Lactate transport</b>                                                                   | <b>0.5</b> |
| <b>Transcription/Regulatory protein</b> |                                                                                            |            |
| <i>blgG</i>                             | Similar to Transcriptional antiterminator                                                  | 3.3        |
| <i>malR</i>                             | Maltose operon transcriptional repressor                                                   | 3.6        |
| <i>lytT</i>                             | Similar to Response regulator of the LytR/AlgR family                                      | 3.7        |
| <i>marR</i>                             | Similar to MarR; Transcriptional regulators                                                | 4.1        |
| SAOUHSC_00992                           | MarR family transcriptional regulator                                                      | 2.8        |
| SAOUHSC_00296                           | ROK family protein (repressors, open reading frames, and kinases)                          | 2.3        |
| SAOUHSC_02057                           | dUTP pyrophosphatase                                                                       | 2.0        |
| <i>agrB</i>                             | <b>Accessory gene regulator protein B</b>                                                  | <b>0.4</b> |
| <i>agrD</i>                             | <b>Similar to Staphylococcal AgrD protein</b>                                              | <b>0.4</b> |
| <i>argC</i>                             | <b>Accessory gene regulator protein C</b>                                                  | <b>0.4</b> |
| <i>argA</i>                             | <b>Accessory gene regulator protein A</b>                                                  | <b>0.4</b> |
| <b>Translation</b>                      |                                                                                            |            |
| SAOUHSC_02836                           | Similar to sortase and related acyltransferases                                            | 0.4        |
| <b>Stress response protein</b>          |                                                                                            |            |
| <i>asp23</i>                            | <b>Stress response protein</b>                                                             | <b>0.3</b> |
| <i>trxB</i>                             | <b>Similar to thioredoxin reductase</b>                                                    | <b>0.4</b> |
| <b>Bacteriophage</b>                    |                                                                                            |            |
| SAOUHSC_01528                           | bacteriophage L54aIlg-like domain-containing protein                                       | 2.7        |
| SAOUHSC_01533                           | Similar to gp6; Head-Tail Connector Protein gp6 of Bacteriophage HK97 and similar proteins | 2.5        |
| SAOUHSC_01539                           | terminase small subunit                                                                    | 3.1        |
| SAOUHSC_01580                           | phi PVL ORF 30-like protein                                                                | 2.5        |

|                         |                                                                            |            |
|-------------------------|----------------------------------------------------------------------------|------------|
| SAOUHSC_02027           | SLT orf 129-like protein                                                   | 3.6        |
| SAOUHSC_02061           | phi PVL orf 50-like protein                                                | 2.8        |
| SAOUHSC_02084           | phage repressor protein                                                    | 2.2        |
| SAOUHSC_02186           | phi PVL orf 12-like protein                                                | 2.2        |
| SAOUHSC_02187           | HK97 family phage protein                                                  | 2.9        |
| SAOUHSC_02191           | phi PVL orf 12-like protein                                                | 2.2        |
| SAOUHSC_02207           | phi PVL/orf 52-like protein                                                | 3.2        |
| SAOUHSC_02213           | phi ETA orf 25-like protein                                                | 2.5        |
| <b>Membrane Protein</b> |                                                                            |            |
| SAOUHSC_00069           | Protein A                                                                  | 3.6        |
| <i>ebh</i>              | Extracellular matrix binding protein                                       | 3.6        |
| <i>rlp</i>              | RGD-containing lipoprotein (lipoprotein containing Arg-Gly-Asp)            | 4.8        |
| SA_tandem_lipo          | Staphylococcus tandem lipoproteins                                         | 2.1        |
| <i>epiA</i>             | lantibiotic epidermin biosynthesis protein EpiB                            | 2.3        |
| <i>chp</i>              | chemotaxis-inhibiting protein CHIPS                                        | 3.4        |
| <i>drp35</i>            | lactonase Drp35                                                            | 2.6        |
| <i>lytN</i>             | cell wall hydrolase                                                        | 2.8        |
| <i>sspB</i>             | Cysteine protease                                                          | 2.1        |
| <i>sspA</i>             | Glutamyl endopeptidase                                                     | 2.4        |
| <i>chp</i>              | chemotaxis-inhibiting protein CHIPS                                        | 3.4        |
| <i>lytN</i>             | cell wall hydrolase                                                        | 2.8        |
| <b>SAOUHSC_01135</b>    | <b>Similar to Staph_haemo; Staphylococcus haemolytic protein</b>           | <b>0.3</b> |
| <b>SAOUHSC_01136</b>    | <b>Staph_haemo; Staphylococcus haemolytic protein</b>                      | <b>0.3</b> |
| <i>hld</i>              | <b>delta-hemolysin</b>                                                     | <b>0.3</b> |
| <b>SAOUHSC_02167</b>    | <b>Similar to CompInhib_SCIN; Staphylococcal complement inhibitor SCIN</b> | <b>0.5</b> |
| <i>sak</i>              | <b>Staphylokinase</b>                                                      | <b>0.4</b> |
| <i>sbi</i>              | <b>Immunoglobulin G-binding protein Sbi</b>                                | <b>0.4</b> |

# the change in gene expression meant log<sub>2</sub>fold change  
The bold letters indicate the down regulated genes
